# Supplementary material for: Comparison of Methodologies to Estimate Dietary Cadmium Intake in an Italian Population
Source: MDPI journal article supplement (doi:10.3390/ijerph17072264), 2020-03-27
Supplement: s1 [file s1]

**Table S1.** Linear regression coefficients (Beta) and 95% confidence intervals (CI) between serum cadmium and relevant confounders for adjustment levels.

|                 | Beta Coefficients | (95% CI)         |
|-----------------|-------------------|------------------|
| age             | −0.57             | (−1.20 to 0.06)  |
| sex             | −7.71             | (−20.73 to 5.30) |
| body mass index | 1.03              | (−0.36 to 2.43)  |

**Table S2.** Estimated weekly dietary intake (median (50<sup>th</sup>) and interquartile range (IQR) reported in µg per kilograms of body weight per week) using food frequency questionnaire (WDI<sub>FFQ</sub>) and using serum cadmium biomarker levels (WDI<sub>bio</sub>) in total population and in selected subgroups considering a value of 3% for cadmium absorption in equations (2a) and (2b).

| Subgroups                       | WDI <sub>FFQ</sub> |             |           | WDI <sub>bio</sub> |             |           |
|---------------------------------|--------------------|-------------|-----------|--------------------|-------------|-----------|
|                                 | 50 <sup>th</sup>   | (IQR)       | Range     | 50 <sup>th</sup>   | (IQR)       | Range     |
| <i>All subjects</i>             | 1.34               | (0.86–1.70) | 0.26–3.18 | 0.84               | (0.73–1.08) | 0.55–1.60 |
| <i>Sex</i>                      |                    |             |           |                    |             |           |
| Men                             | 1.30               | (0.87–1.63) | 0.26–3.18 | 0.83               | (0.75–0.98) | 0.55–1.60 |
| Women                           | 1.38               | (0.86–1.91) | 0.30–3.07 | 0.84               | (0.72–1.23) | 0.55–1.48 |
| <i>Age</i>                      |                    |             |           |                    |             |           |
| <50 years                       | 1.29               | (0.80–2.15) | 0.26–3.07 | 0.99               | (0.92–1.23) | 0.68–1.60 |
| ≥50 years                       | 1.37               | (0.87–1.69) | 0.30–3.18 | 0.75               | (0.70–0.81) | 0.55–1.48 |
| <i>BMI<sup>a</sup></i>          |                    |             |           |                    |             |           |
| <25                             | 1.38               | (0.86–1.99) | 0.59–3.07 | 0.93               | (0.77–1.08) | 0.55–1.48 |
| ≥25                             | 1.21               | (0.84–1.62) | 0.26–3.18 | 0.77               | (0.73–1.05) | 0.59–1.60 |
| <i>Smoking habits</i>           |                    |             |           |                    |             |           |
| Never-smokers                   | 1.27               | (0.73–1.60) | 0.26–3.07 | 0.86               | (0.75–0.99) | 0.62–1.32 |
| Former-smokers                  | 1.66               | (1.24–1.95) | 0.62–3.18 | 0.76               | (0.73–0.89) | 0.55–1.48 |
| Current-smokers                 | 1.17               | (1.03–1.36) | 0.72–1.55 | 1.14               | (0.98–1.23) | 0.55–1.60 |
| <i>Smoking habits (recoded)</i> |                    |             |           |                    |             |           |
| Non-smokers                     | 1.37               | (0.86–1.74) | 0.26–3.18 | 0.81               | (0.73–0.96) | 0.55–1.48 |
| Smokers                         | 1.24               | (1.03–1.55) | 0.62–2.32 | 1.14               | (0.98–1.23) | 0.55–1.60 |
